# Supplementary material for: Chronic Opioid Use Following Lumbar Discectomy: Prevalence, Risk Factors, and Current Trends in the United States
Source: PubMed Central journal article supplement — Neurospine. 2020 Dec 31;17(4):879–87. doi: 10.14245/ns.2040122.061 (PMC7788426; doi:10.14245/ns.2040122.061), 2020-12-31
Supplement: ns-2040122-061-suppl1.pdf [file ns-2040122-061-suppl1.pdf]

**Supplementary Table 1.** ICD-9-CM and CPT codes used in cohort definition

| Code name                                                                                                                                                                                                    | Code type | Code(s)                                                                                                                                                 |
|--------------------------------------------------------------------------------------------------------------------------------------------------------------------------------------------------------------|-----------|---------------------------------------------------------------------------------------------------------------------------------------------------------|
| Inclusion criteria                                                                                                                                                                                           |           |                                                                                                                                                         |
| Lumbar disc displacement                                                                                                                                                                                     | ICD-9-CM  | 72210                                                                                                                                                   |
| Laminotomy (hemilaminectomy) with decompression of nerve root(s), including partial facetectomy foraminotomy and/or excision of herniated intervertebral disc; one interspace lumbar                         | CPT       | 63030                                                                                                                                                   |
| Transpedicular approach with decompression of spinal cord equina and/or nerve root(s) (e.g., herniated intervertebral disc) single segment; lumbar (including transfacet or lateral extraforaminal approach) | CPT       | 63056                                                                                                                                                   |
| Exclusion criteria                                                                                                                                                                                           |           |                                                                                                                                                         |
| Arthrodesis or instrumentation                                                                                                                                                                               | CPT       | 22101, 22102, 22103, 22110, 22114, 22116, 22707, 22208, 22214, 22224, 22533, 22534, 22558, 22586, 22612, 22630, 22633, 22800, 22819, 22840, 22842 22865 |
| Revision discectomy                                                                                                                                                                                          | CPT       | 63042                                                                                                                                                   |

ICD-9-CM, International Classification of Diseases, 9th edition, clinical modification; CPT, current procedural terminology.
