# Supplementary material for: Chronic Opioid Use Following Lumbar Discectomy: Prevalence, Risk Factors, and Current Trends in the United States
Source: PubMed Central journal article supplement — Neurospine. 2020 Dec 31;17(4):879–87. doi: 10.14245/ns.2040122.061 (PMC7788426; doi:10.14245/ns.2040122.061), 2020-12-31
Supplement: ns-2040122-061-suppl2.pdf [file ns-2040122-061-suppl2.pdf]

**Supplementary Table 2.** ICD-9-CM codes used to identify medical comorbidities

| Comorbidity           | ICD-9-CM/CPT code(s)                                                                             |
|-----------------------|--------------------------------------------------------------------------------------------------|
| Depression            | 296.20–296.25, 296.30–296.35, 300.4, 311                                                         |
| Anxiety               | 300.00–300.02, 309.24                                                                            |
| COPD                  | 416.8, 416.9, 490–505, 506.4, 508.1, 508.8                                                       |
| CHF                   | 398.91, 402.01, 402.11, 402.91, 404.01, 404.03, 404.11, 404.13, 404.91, 404.93, 425.4–425.9, 428 |
| Chronic pain          | 338.29, 338.4                                                                                    |
| Hypertension          | 401, 402–405, 642, 437.2                                                                         |
| Myocardial infarction | 410, 412, 998.0, 9971, 411, 429.7                                                                |
| DM, uncomplicated     | 250.0–250.3, 250.7                                                                               |
| DM, complicated       | 250.4–250.6                                                                                      |
| Obesity               | 278.0, 649.1, 793.91, V853, V854, V8554                                                          |
| Drug abuse            | 292.0, 292.8–292.9, 304, 305.2–305.9, 648.3                                                      |
| Alcohol abuse         | 265.2, 291.1–291.3, 291.5, 291.8, 303, 305.0                                                     |
| Tobacco use           | V15.82, 989.84, 649.0                                                                            |
| Osteoporosis          | 733, V1781, V8281                                                                                |

COPD, chronic obstructive pulmonary disease; CHF, congestive heart failure; DM, diabetes mellitus.
